# Supplementary material
Source: PubMed Central journal article supplement (PMC4874240)
Supplement: TB-004-C5TB01994J-s001.pdf [file TB-004-C5TB01994J-s001.pdf]

**Supporting Information For;**

**Glycosylated Gold Nanoparticle Libraries for Label-Free Multiplexed**

**Lectin Biosensing**

Sarah-Jane Richards,<sup>a</sup> Luciene Otten and Matthew I. Gibson<sup>a,\*</sup>

<sup>a</sup> Department of Chemistry, University of Warwick, Coventry, CV4 7AL

\*Corresponding Author Information

Fax: +44(0)2476 524112;

E-mail : [m.i.gibson@warwick.ac.uk](mailto:m.i.gibson@warwick.ac.uk)

## Methods

### *Synthesis of 2-(Dodecylthiocarbonothioylthio)-2-methylpropionic acid (DMP) –*

Dodecane thiol (4.00 g, 19.76 mmol) was added dropwise to a stirred suspension of  $K_3PO_4$  (4.20g, 19.76 mmol) in acetone (60 mL) over 25 minutes.  $CS_2$  (4.10 g, 53.85 mmol) was added and the solution turned bright yellow. After stirring for ten minutes 2-bromo-2-methylpropionic acid (3.00 g, 17.96 mmol) was added and a precipitation of KBr was noted. After stirring for 16 hours, the solvent was removed under *in vacuo* and the residue was extracted into DCM (2 x 200 mL) from 1M HCl (200 mL). The organic extracts were washed with water (200 mL) and brine (200 mL) and further dried over  $MgSO_4$ . The solvent was removed under reduced pressure and the residue was purified by column chromatography on silica using an eluent comprising 75:24:1 40 – 60 °C petroleum ether: diethyl ether: acetic acid to yield a bright yellow solid (4.01 g, 61 %).

$^1H$  NMR (300 MHz,  $CDCl_3$ )  $\delta_{ppm}$ : 3.26 (2H, t,  $J_{12-11} = 7.40$  Hz,  $H^{12}$ ); 1.70 (6H, s,  $H^{13}$ ); 1.65 (2H, m,  $H^{11}$ ); 1.36 (2H, m,  $H^{10}$ ); 1.23 (16H, br. s,  $H^{2-9}$ ); 0.86 (3H, t,  $J_{1-2} = 6.5$  Hz,  $H^1$ ).

$^{13}C$  NMR (500 MHz,  $CDCl_3$ )  $\delta_{ppm}$ : 220.19 ( $C^{13}$ ); 177.76 ( $C^{16}$ ); 54.91 ( $C^{14}$ ); 36.46 ( $C^{12}$ ); 31.31, 29.02, 28.95, 28.84, 28.74, 28.50, 28.36, 22.08 ( $C^{2-9}$ ); 28.59 ( $C^{10}$ ); 27.19 ( $C^{11}$ ); 24.60 ( $C^{15}$ ); 13.52 ( $C^1$ ).

IR v: 2921 ( $CH_2$ ); 1714 ( $C=O$ ); 1070 (S-( $C=S$ )-S)  $cm^{-1}$ .

### *Synthesis of Pentafluorophenyl 2-(Dodecylthiocarbonothioylthio)-2-methylpropionic acid (PFP-DMP) –*

DMP (0.5 g, 1.37 mmol), N-(3-Dimethylaminopropyl)-N'-ethylcarbodiimide hydrochloride (EDC) (0.39 g, 2.05 mmol), and 4-(dimethylamino)pyridine (DMAP) (0.25 g, 2.05 mmol) in

40 mL DCM was stirred for 20 minutes under N<sub>2</sub>. Pentafluorophenol (0.78 g, 4.24 mmol) in 5 mL DCM was added. The reaction was stirred overnight at room temperature. The reaction was washed successively with 3 M HCl, 1 M NaHCO<sub>3</sub> and 0.5 M NaCl. The reaction was then dried over MgSO<sub>4</sub>, filtered and then concentrated *in vacuo*.

<sup>1</sup>H NMR (300 MHz, CDCl<sub>3</sub>) δ<sub>ppm</sub>: 3.29 (2H, t, J<sub>12-11</sub> = 7.3 Hz, H<sup>12</sup>); 1.84 (6H, s, H<sup>13</sup>); 1.67 (2H, q, J = 7 Hz, H<sup>11</sup>); 1.37 (2H, m, H<sup>10</sup>); 1.23 (16H, br. s, H<sup>2-9</sup>); 0.86 (3H, t, J<sub>1-2</sub> = 6.5 Hz, H<sup>1</sup>).

<sup>13</sup>C NMR (500 MHz, CDCl<sub>3</sub>) δ<sub>ppm</sub>: 220.19 (C<sup>13</sup>); 169.77 (C<sup>16</sup>); 54.91 (C<sup>14</sup>); 36.46 (C<sup>12</sup>); 31.31, 29.02, 28.95, 28.84, 28.74, 28.50, 28.36, 22.08 (C<sup>2-9</sup>); 28.59 (C<sup>10</sup>); 27.19 (C<sup>11</sup>); 24.60 (C<sup>15</sup>); 13.52 (C<sup>1</sup>).

IR v: 2921 (CH<sub>2</sub>); 1779 (C<sub>6</sub>F<sub>5</sub>C=O); 1070 (S-(C=S)-S) cm<sup>-1</sup>.

#### *Polymerisation of hydroxyethyl acrylamide using PFP-DMP DP20*

*N*-Hydroxyethyl acrylamide (HEA) (0.5 g, 4.34 mmol), Pentafluorophenyl 2-(Dodecylthiocarbonothioylthio)-2-methylpropionic acid (PFP-DMP) (0.115 g, 0.22 mmol), 4,4'-Azobis(4-cyanovaleric acid) (ACVA) (0.0122 g, 0.043 mmol) were dissolved in 50:50 Toluene:Methanol (4 mL). Mesitylene (150 μL) was added as an internal reference. An aliquot was taken for NMR analysis in CDCl<sub>3</sub>. The solution was degassed under N<sub>2</sub> for 30 mins. The reaction was stirred at 70 °C for 90 mins. An aliquot was taken for NMR analysis in MeOD. The reaction was rapidly cooled in liquid nitrogen and precipitated into diethyl ether. The polymer was reprecipitated into diethyl ether from methanol twice to yield a yellow polymer product that was dried under vacuum. 90 % conversion by NMR, M<sub>n</sub> (Theoretical) = 2800 g.mol<sup>-1</sup> M<sub>n</sub>(SEC) = 4100 g.mol<sup>-1</sup> M<sub>n</sub>/M<sub>w</sub> (SEC) = 1.14.

### *Particle size determination by Dynamic Light Scattering (DLS)*

400  $\mu\text{L}$  of glycoAuNPs in a disposable low volume cuvette. 3 measurements comprised of 10 runs were made of each sample at 25 °C. Average size and distribution were recorded.

### *Lectin induced aggregation studies by pixel intensity*

The plates were then scanned using a canon flatbed scanner, the images were converted to a HSB stack and the saturation image was used for tiff image file uploaded into the open-source image processing package ImageJ (version 1.46a) where a region of interest was drawn around every well. The colour (RGB) image was then converted into a hue saturation and brightness (HSB) stack of images and the saturation image used. The regions of interest drawn on the original image were added to the saturation image using the ROI manager and average pixel intensity in each region of interest was measured using an inbuilt function in ImageJ.

### *Linear discriminant analysis*

A fixed concentration of 6.25  $\mu\text{g}\cdot\text{mL}^{-1}$  lectin was added to glycoAuNPs. 5 repeats were made for each carbohydrate functionalised particle and the absorbance at 450 nm and 750 nm were recorded for linear discriminant analysis.

Every lectin was added to every surface as described in the lectin binding assay section. This was repeated 4 times to generate a training data matrix of 6 particles x 6 lectins x 5 replicates, which was then subjected to a classical linear discriminant analysis (LDA) in R (version 2.14.1).

## Additional Figures

Size determination of goldnanoparticles by DLS. Before functionalisation (60 nm) and after functionalisation with carbohydrate terminated polymers. There is a size increase of about 5 nm.

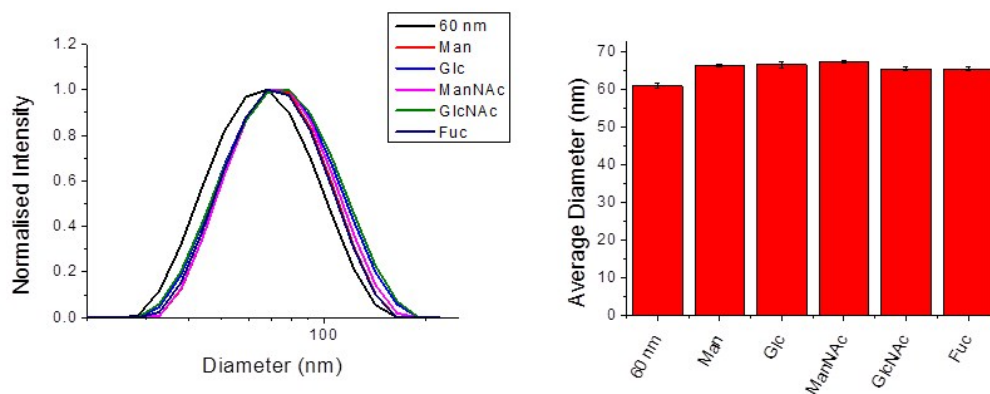

**Figure S1:** DLS characterisation of particles before and after functionalisation with carbohydrate functionalised polymers

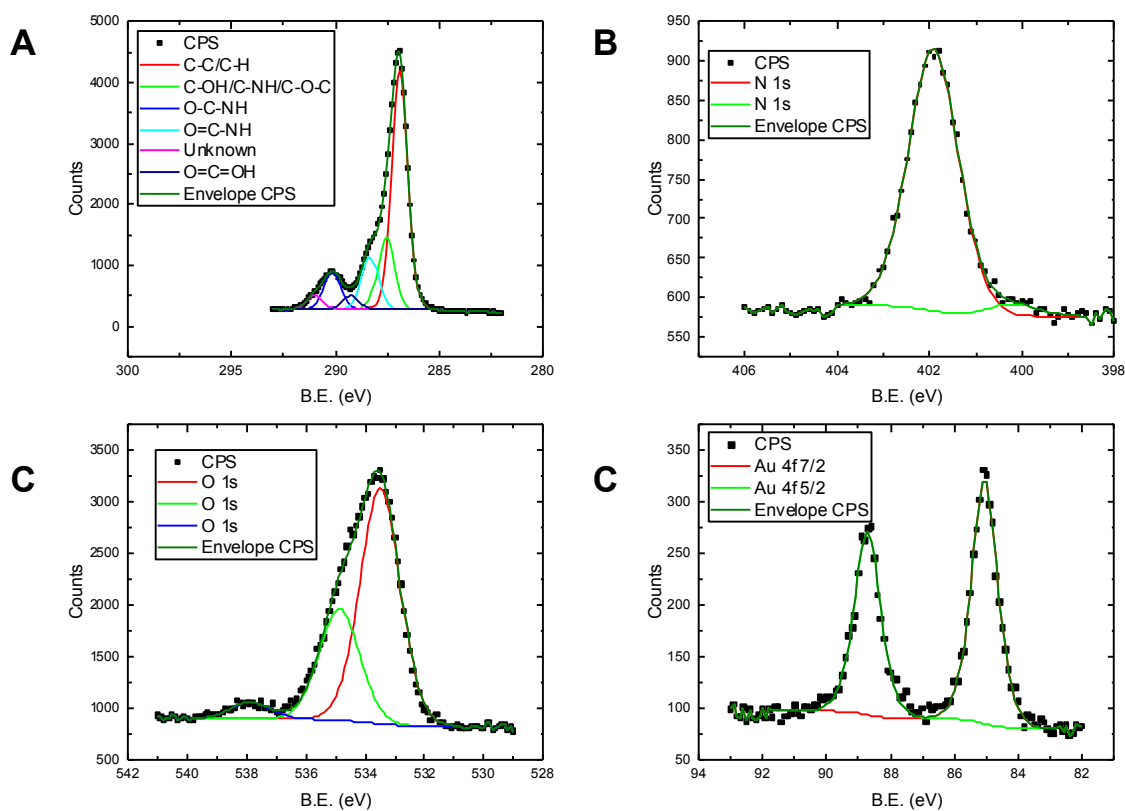

**Figure S2:** XPS A) C1s B) N1s C) O1s D) Au4f

$K_d$  values for each lectin on each surface derived from the hill plots.

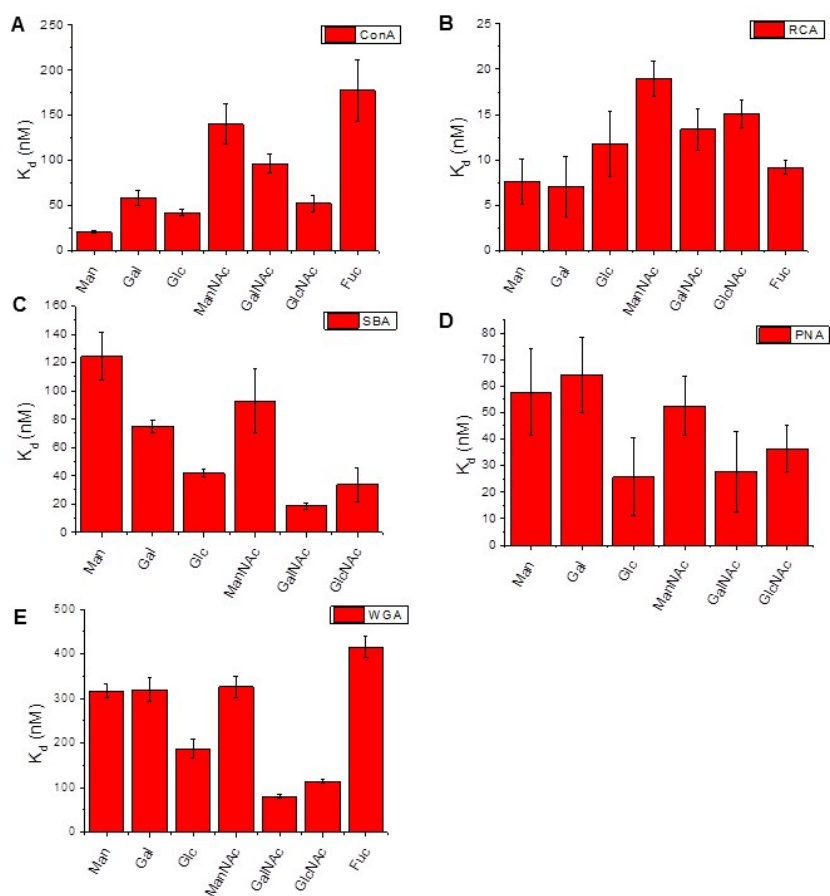

**Figure S3:**  $K_d$  apparent values for all carbohydrate functionalised particles with A) Con A, B) RCA<sub>120</sub>, C) SBA, D) PNA and E) WGA. This is the graphical representation of Table 1 from the main article.

Size increase of over time of glyco-goldnanoparticles upon addition of 200 nM SBA.

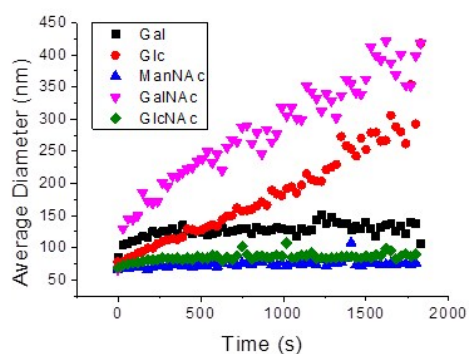

**Figure S4:** DLS: Kinetic increase in particle size due to aggregation induced by addition of 200 nM SBA.

Absorbance spectra for each glycoAuNP and lectin pairing.

Mannose functionalised particles

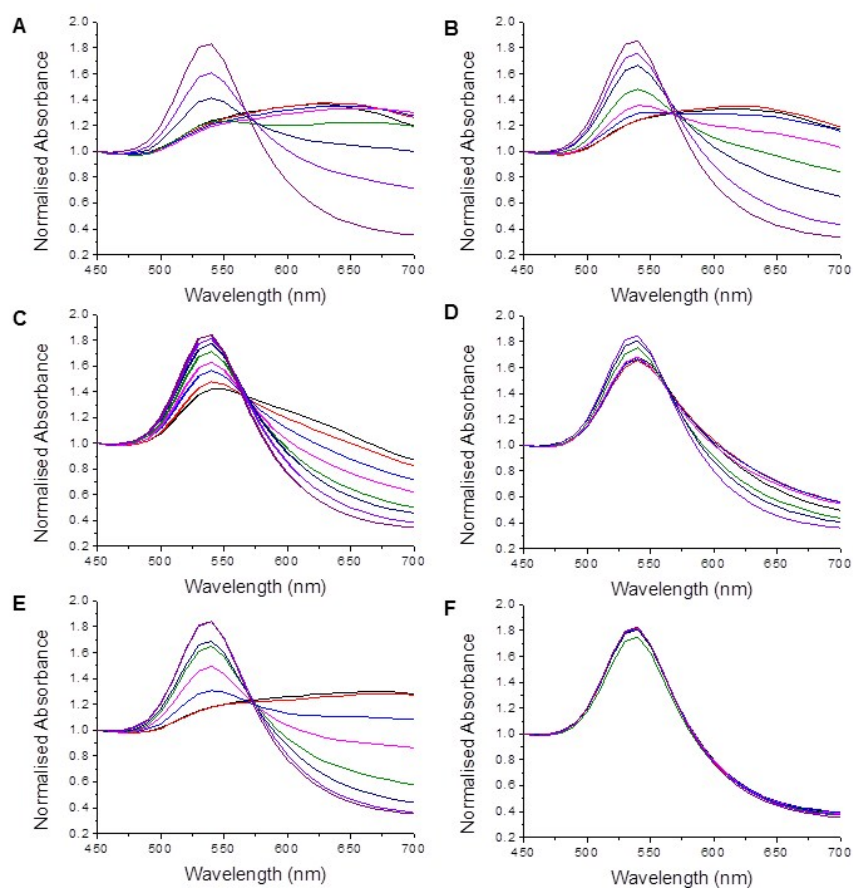

**Figure S5:** Man-AuNPs with A) Con A, B) RCA, C) SBA, D) PNA, E) WGA, F) UEA.

## Galactose functional particles

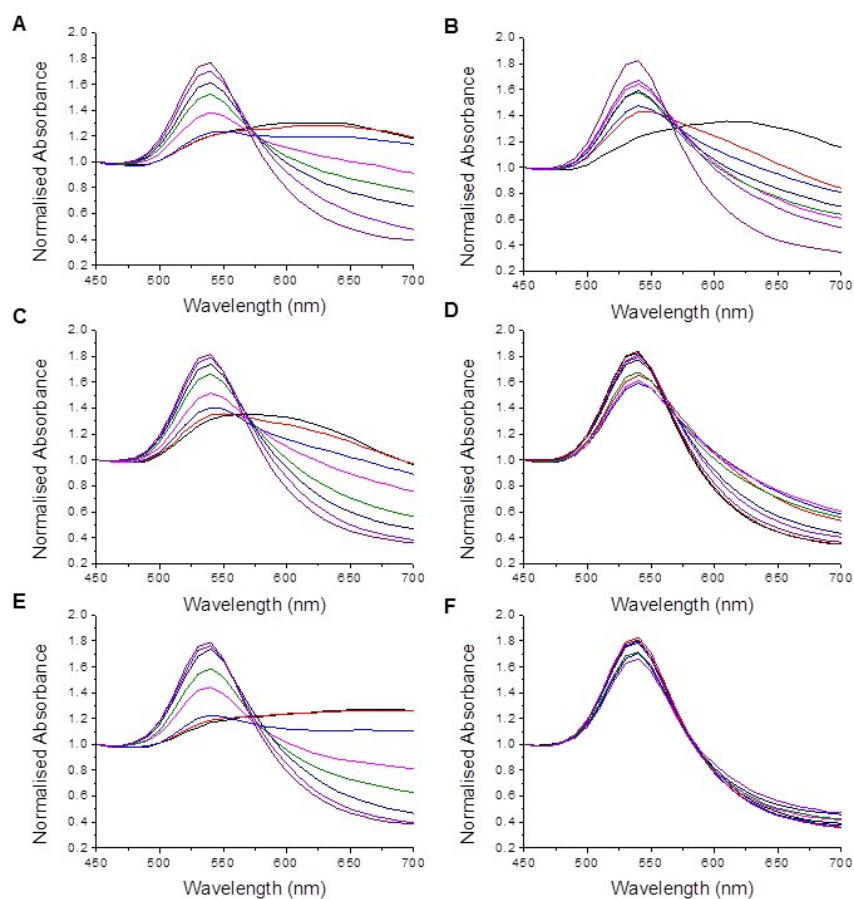

**Figure S6:** Gal-AuNPs with A) Con A, B) RCA, C) SBA, D) PNA, E) WGA, F) UEA.



## Glucose functional particles

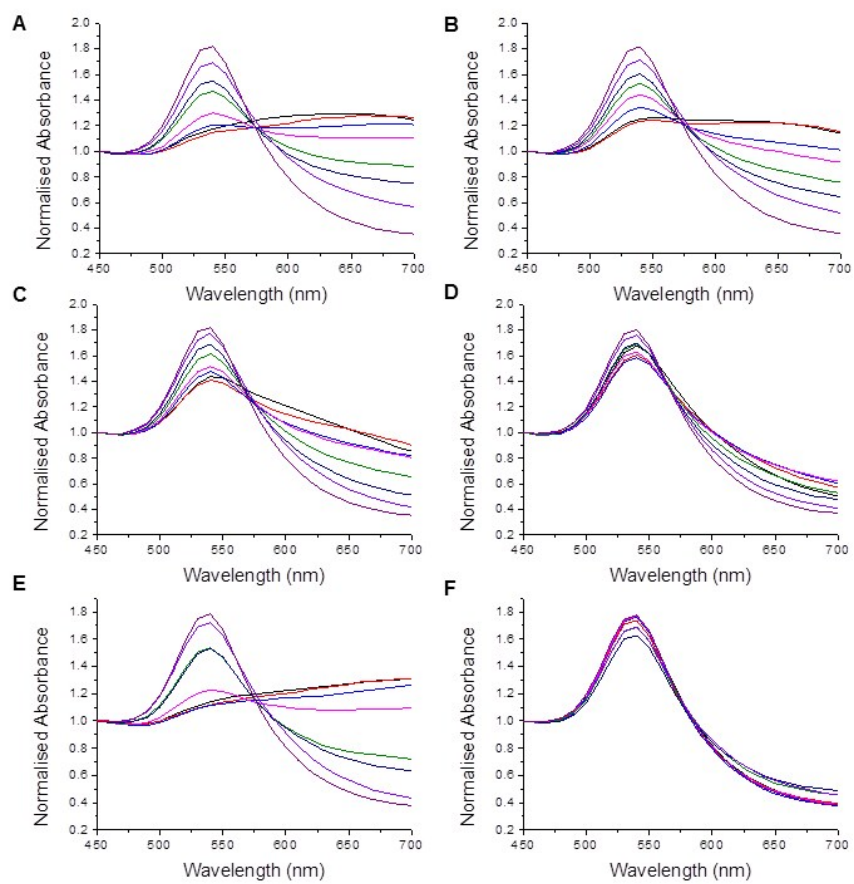

**Figure S7:** Glc-AuNPs with A) Con A, B) RCA, C) SBA, D) PNA, E) WGA, F) UEA.

*N*-acetylmannosamine functional particles

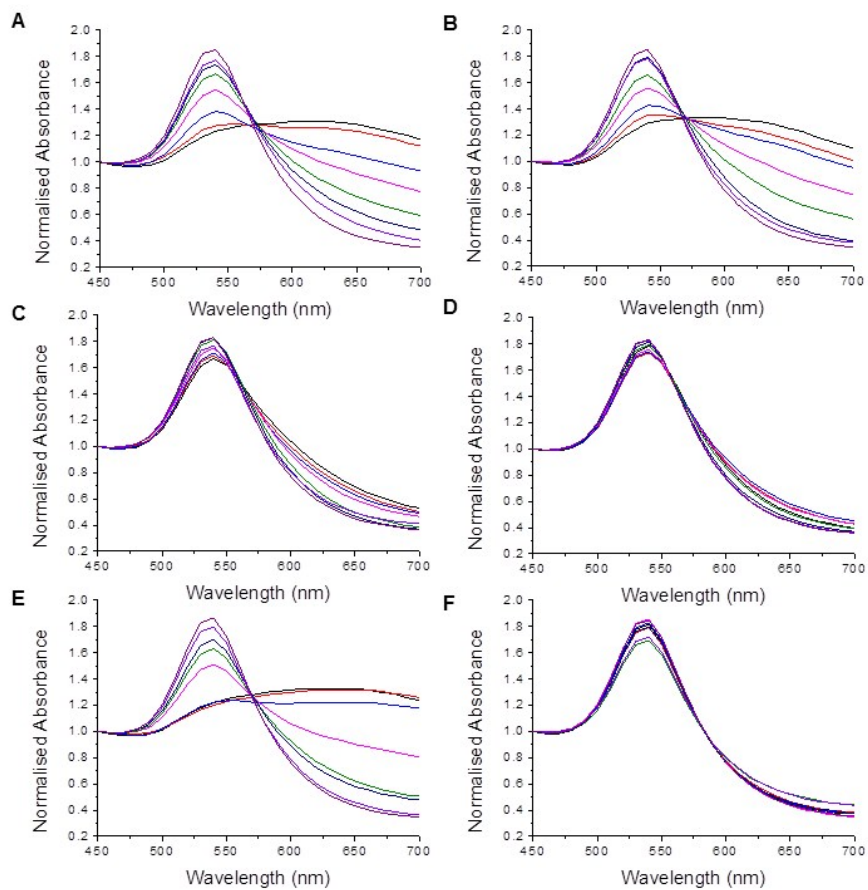

**Figure S8:** ManNAc-AuNPs with A) Con A, B) RCA, C) SBA, D) PNA, E) WGA, F) UEA.

*N*-acetylgalactosamine functional particles

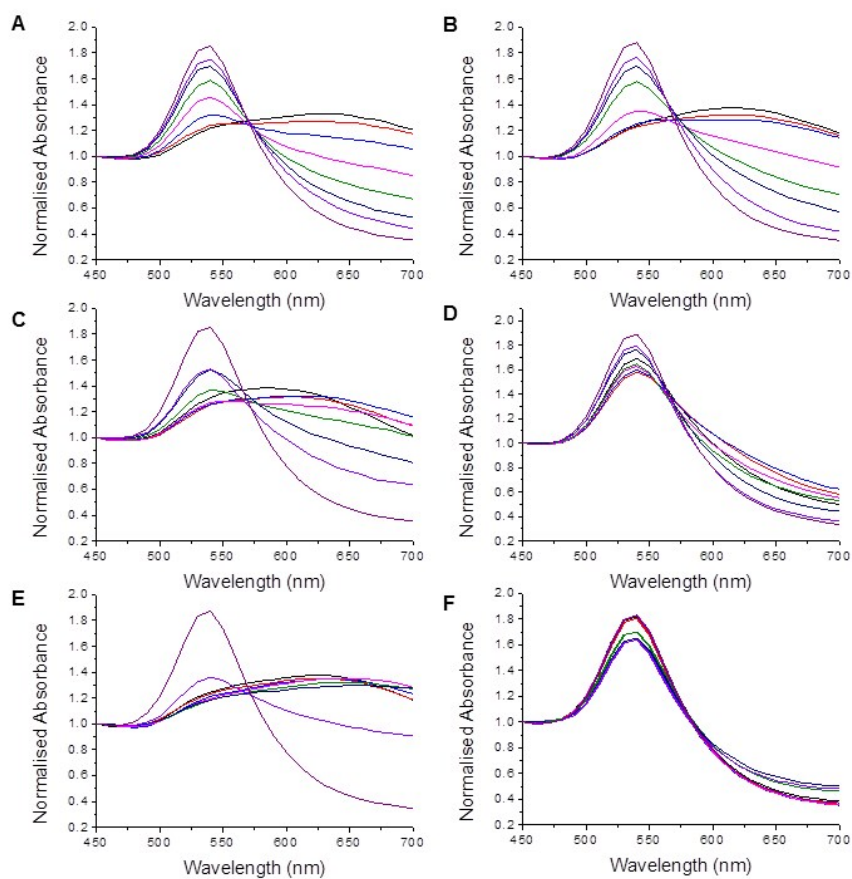

**Figure S9:** GalNAc-AuNPs with A) Con, B) RCA, C) SBA, D) PNA, E) WGA, F) UEA.

*N*-acetylglucosamine functional particles

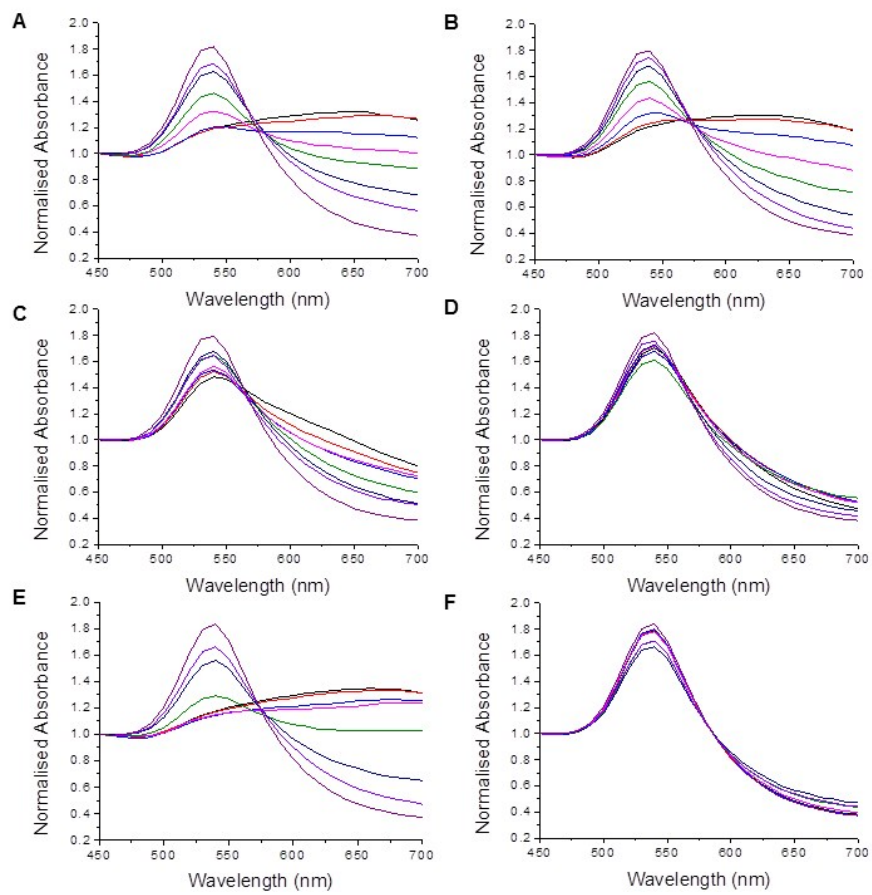

**Figure S10:** GlcNAc-AuNPs with A) Con A, B) RCA, C) SBA, D) PNA, E) WGA, F) UEA.

## Fucose functional particles

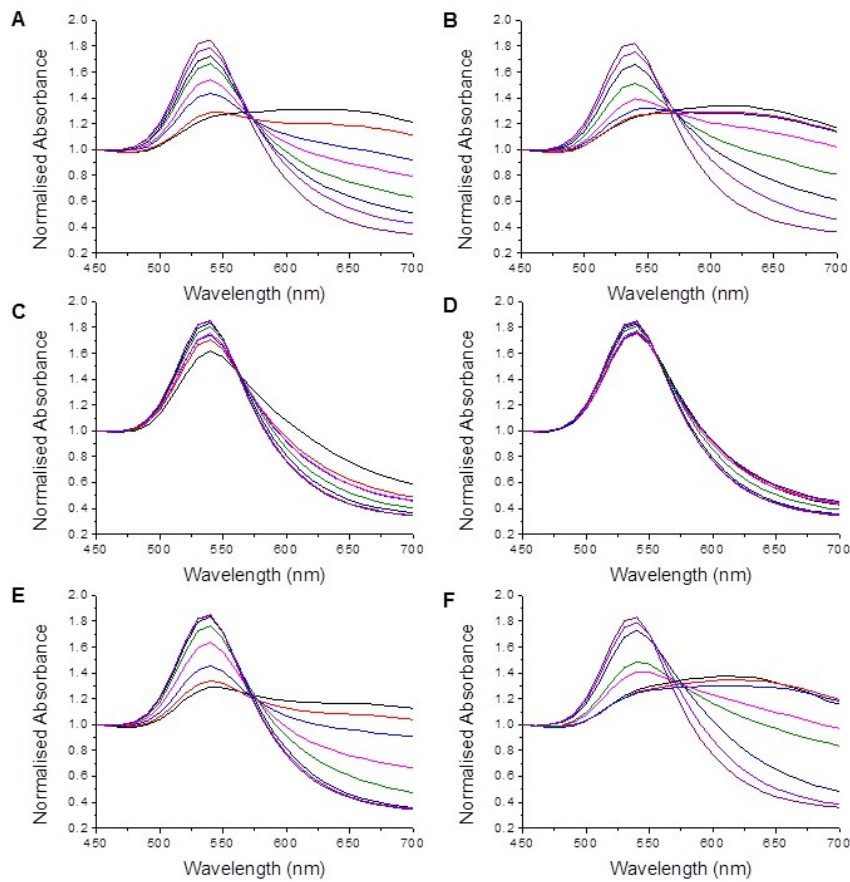

**Figure S11:** Fuc-AuNPs with A) Con A, B) RCA, C) SBA, D) PNA, E) WGA, F) UEA.

Determining apparent  $K_d$  values using a image J to determine pixel intensity of a scanned image of the 96 well plate.

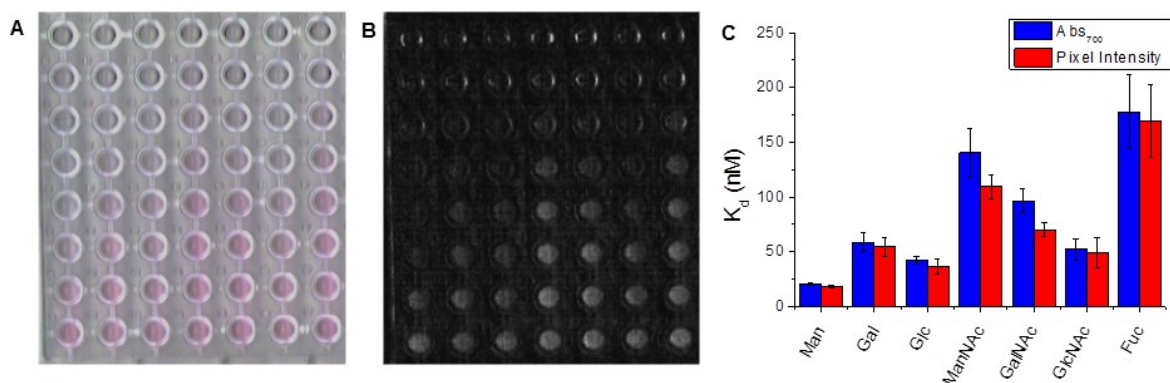

**Figure S12:** Direct optical analysis of Con A binding. A) Scanned image of glycoAuNPs with a dilution series of Con A after 30 minutes. (B) Saturation image used for pixel intensity measurement (high intensity = red, low intensity = blue). C) Comparison of  $K_d$  calculated by  $Abs_{700}$  and pixel intensity.

Correlation between  $K_d$  determined by absorbance and by using pixel intensity determined from a scanned image of the 96-well plate for Con A, RCA, SBA and WGA.

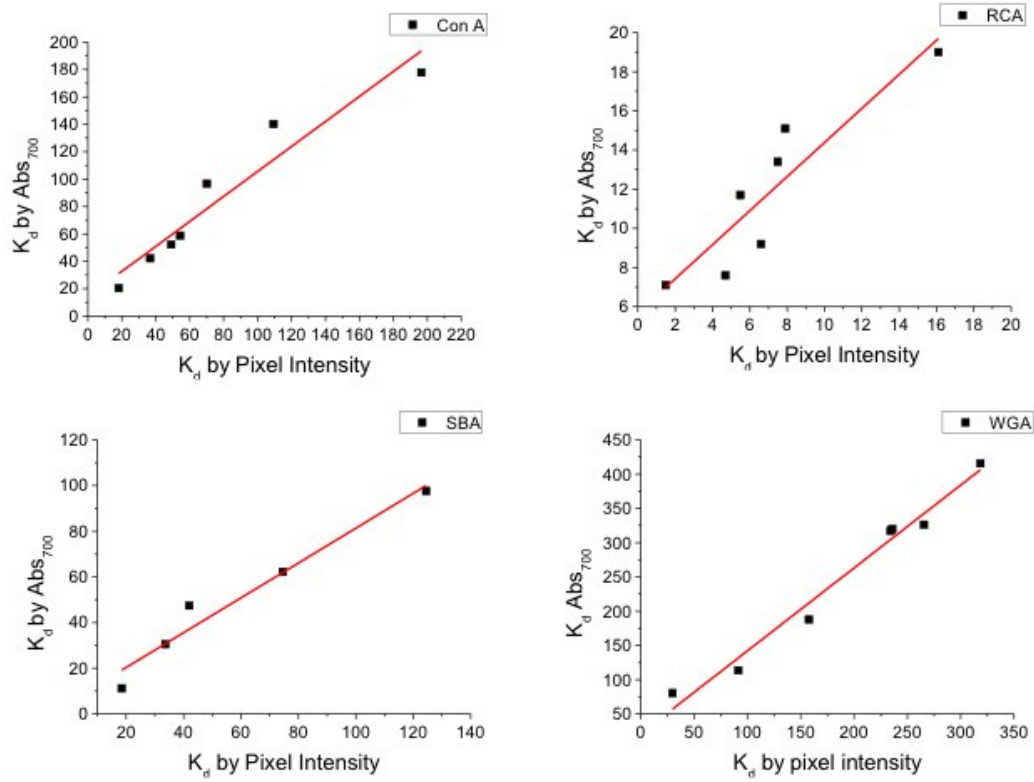

**Figure S13:** Correlation between  $K_d$  values obtained from  $Abs_{700}$  measurements using a uv/vis plate reader vs. pixel intensity from a scanned image.
